# Supplementary material
Source: HighWire-hosted journal article supplement (https://www.cmaj.ca/content/suppl/2012/03/19/156.6.1-s)
Supplement: sinusitus.pdf [file sinusitus.pdf]

# A practical guide for the diagnosis and treatment of acute sinusitis

Donald E. Low, MD; Martin Desrosiers, MD; James McSherry, MB, ChB; Gary Garber, MD; John W. Williams Jr., MD; Huguette Rémy, MD; Ronald S. Fenton, MD; Vito Forte, MD; Meyer Balter, MD; Coleman Rotstein, MD; Carl Craft, MD; Jacques Dubois, PhD; Godfrey Harding, MD; Melvin Schloss, MD; Mark Miller, MSc, MD; R. Andrew McIvor, MSc, MD; Ross J. Davidson, PhD

## Abstract

**Objective:** To develop guidelines for the diagnosis and management of acute sinusitis.

**Options:** Diagnostic clinical criteria and imaging techniques, the role of antimicrobial therapy and duration of treatment, and the role of adjunct therapy, including decongestants, glucocorticosteroids and nasal irrigation.

**Outcomes:** Improved accuracy of clinical diagnosis, better utilization of imaging techniques and rational use of antimicrobial therapy.

**Evidence:** A MEDLINE search for relevant articles published from 1980 to 1996 using the MeSH terms "sinusitis," "acute sinusitis," "respiratory infections," "upper respiratory infections," "sinusitis" and "diagnosis," "sinusitis" and "therapy," "sinusitis" and "etiology," and "antimicrobial resistance" and search for additional articles from the reference lists of retrieved articles. Papers referring to chronic sinusitis, sinusitis in compromised patients and documented nonbacterial sinusitis were excluded. The evidence was evaluated by participants at the Canadian Sinusitis Symposium, held in Toronto on April 26–27, 1996.

**Values:** A hierarchical evaluation of the strength of evidence modified from the methods of the Canadian Task Force on the Periodic Health Examination was used. Strategies were identified to deal with problems for which no adequate clinical data were available. Recommendations arrived at by consensus of the symposium participants were included.

**Benefits, harms and costs:** Increased awareness of acute sinusitis, accurate diagnosis and prompt treatment should reduce costs related to unnecessary investigations, time lost from work and complications due to inappropriate treatment. As well, physicians will be better able to decide which patients will not require antimicrobial therapy, thus saving the patient the cost and potential side effects of treatment.

**Recommendations:** Clinical diagnosis can usually be made from the patient's history and findings on physical examination only. Five clinical findings comprising 3 symptoms (maxillary toothache, poor response to decongestants and a history of coloured nasal discharge) and 2 signs (purulent nasal secretion and abnormal transillumination result) are the best predictors of acute bacterial sinusitis (level I evidence). Transillumination is a useful technique in the hands of experienced personnel, but only negative findings are useful (level III evidence). Radiography is not warranted when the likelihood of acute sinusitis is high or low but is useful when the diagnosis is in doubt (level III evidence). First-line therapy should be a 10-day course of amoxicillin (trimethoprim-sulfamethoxazole should be given to patients allergic to penicillin) (level I evidence) and a decongestant (level III evidence). Patients allergic to amoxicillin and those not responding to first-line therapy should be switched to a second-line agent. As well, patients with recurrent episodes of acute sinusitis who have been assessed and found not to have anatomic anomalies may also benefit from second-line therapy (level III evidence).

**Validation:** The recommendations are based on consensus of Canadian and American experts in infectious diseases, microbiology, otolaryngology and family medicine. The guidelines were reviewed independently for the advisory committee by 2 external experts. Previous guidelines did not exist in Canada.

**Sponsor:** The Canadian Sinusitis Symposium and the technical support and assistance of Core Health Inc. in preparing this manuscript were funded through an unrestricted educational grant from Abbott Laboratories, Limited. The advisory committee for the symposium had full control over the content of the guidelines.

## Special supplement

## Supplément spécial

The authors were participants at the Canadian Sinusitis Symposium. Information about the authors and the other symposium participants appears at the end of the article.

*This article has been peer reviewed.*

*Can Med Assoc J 1997;156(6 suppl):S1-S14*

## Résumé

**Objectif :** Élaborer des lignes directrices sur le diagnostic et la prise en charge de la sinusite aiguë.

**Options :** Critères cliniques de diagnostic et techniques d'imagerie, rôle et durée du traitement antimicrobien, et rôle du traitement d'appoint, y compris les décongestionnants, les glucocorticoïdes et l'irrigation nasale.

**Résultats :** Diagnostic clinique plus précis, meilleure utilisation des techniques d'imagerie et utilisation rationnelle du traitement antimicrobien.

**Preuves :** Une recherche, dans MEDLINE, d'articles pertinents publiés entre 1980 et 1996, effectuée au moyen des expressions MeSH «sinusitis», «acute sinusitis», «respiratory infections», «upper respiratory infections», «sinusitis» et «diagnosis», «sinusitis» et «therapy», «sinusitis» et «etiology», et «antimicrobial resistance» et recherche d'articles supplémentaires à partir des listes de référence des articles extraits. On a exclu les communications portant sur la sinusite chronique, la sinusite chez les patients compromis et la sinusite non bactérienne documentée. Les données probantes ont été évaluées par les participants au Symposium canadien sur la sinusite, qui a eu lieu à Toronto les 26 et 27 avril 1996.

**Valeurs :** On a utilisé une évaluation hiérarchique de la solidité des données probantes, inspirée des méthodes du Groupe d'étude canadien sur l'examen médical périodique. On a défini des stratégies pour régler des problèmes à l'égard desquels on ne disposait pas de données cliniques suffisantes. On a inclus des recommandations émanant d'un consensus des participants.

**Avantages, préjudices et coûts :** Une sensibilisation accrue à la sinusite aiguë, un diagnostic exact et un traitement rapide devraient réduire les coûts liés aux examens inutiles, le temps de travail perdu et les complications causées par un traitement inapproprié. En outre, les médecins seront mieux placés pour décider quels patients n'auront pas besoin d'un traitement antimicrobien, ce qui évitera au patient le coût du traitement et des effets secondaires possibles.

**Recommandations :** On peut habituellement poser un diagnostic clinique à partir des antécédents du patient et des résultats de l'examen physique seulement. Cinq constatations cliniques comportant 3 symptômes (odontalgie maxillaire, décongestionnants ayant peu d'effets et antécédents de rinorrhée nasale colorée) et 2 signes (sécrétions nasales purulentes et résultat anormal de la transillumination) sont les meilleurs prédicteurs de la sinusite bactérienne aiguë (données probantes de niveau I). La transillumination est une technique utile lorsqu'elle est utilisée par du personnel chevronné, mais seuls les résultats négatifs sont utiles (données probantes de niveau III). Une radiographie n'est pas justifiée lorsque la probabilité de sinusite aiguë est élevée ou faible, mais elle est utile lorsque le diagnostic est douteux (données probantes de niveau III). La thérapie de premier recours devrait être un traitement de 10 jours à l'amoxicilline (il faudrait donner du triméthoprim-sulfaméthoxazole aux patients allergiques à la pénicilline) (données probantes de niveau I) et un décongestionnant (données probantes de niveau III). Les patients allergiques à l'amoxicilline et ceux qui ne réagissent pas à un traitement de choix devraient passer à un agent mineur. En outre, les patients qui ont des épisodes récurrents de sinusite aiguë, que l'on a examinés et qui ne présentent pas d'anomalie anatomique peuvent aussi bénéficier d'une thérapie mineure (données probantes de niveau III).

**Validation :** Les recommandations sont fondées sur un consensus d'experts canadiens et américains en maladies infectieuses, microbiologie, otorhinolaryngologie et médecine familiale. Deux experts de l'extérieur ont procédé à une étude indépendante des lignes directrices pour le compte du comité consultatif. Il n'y avait pas de lignes directrices auparavant au Canada.

**Commanditaire :** Le Symposium canadien sur la sinusite et l'aide et l'appui techniques de Core Health Inc. dans la préparation du présent manuscrit ont été financés par une subvention de recherche sans restriction des Laboratoires Abbott du Canada. Le comité consultatif du symposium contrôle entièrement le contenu des lignes directrices.

Acute sinusitis is one of the most common conditions treated in the outpatient setting in North America. Of Americans surveyed about current health problems, 14% reported a diagnosis of sinusitis.<sup>1,2</sup> Acute sinusitis accounts for 4.6% of physician visits by young adults.<sup>3</sup> In the 1992 National Ambulatory Medical Survey, sinusitis was the fifth most common diagnosis for which an antibiotic was prescribed in the United States (J.W.W.: personal communication).

About 0.5% of common colds are complicated by signs or symptoms of paranasal sinusitis, most often localized to or involving the maxillary sinus.<sup>4-8</sup> Each year, on average, adults have 2 to 3 colds and children 6 to 8; thus, the absolute number of people with signs and symptoms compatible with sinusitis annually is high.<sup>4-6</sup>

This consensus statement was designed to provide a framework to guide primary care physicians in the cost-effective diagnosis and management of this common

problem. Previous Canadian guidelines do not exist. To the best of our knowledge, the only other document to mention the diagnosis and treatment of sinusitis was published as the proceedings of a meeting in Florida in 1990.<sup>9</sup>

## Literature review

A MEDLINE search was performed for relevant articles published from 1980 to 1996 using the MeSH terms "sinusitis," "acute sinusitis," "respiratory infections," "upper respiratory infections," "sinusitis" and "diagnosis," "sinusitis" and "therapy," "sinusitis" and "etiology," and "antimicrobial resistance." The reference lists of retrieved articles were reviewed for additional articles. Papers referring to chronic sinusitis, sinusitis in compromised patients and documented nonbacterial sinusitis were excluded.

The evidence was discussed at the Canadian Sinusitis Symposium, a consensus conference held in Toronto April 26–27, 1996. Participants at the symposium included experts in microbiology, infectious diseases, otolaryngology and family practice. The focus was on the difficulties of diagnosis and the appropriate treatment of acute sinusitis.

The symposium participants used a hierarchical evaluation of the strength of evidence modified from the methods of the Canadian Task Force on the Periodic Health Examination.<sup>10</sup> Emphasis was placed on randomized, placebo-controlled clinical trials (level I evidence) and well-designed controlled trials without randomization (level II evidence) when available. Opinions of respected authorities based on clinical experience, descriptive studies and reports of expert committees (level III evidence) were assigned a lower weight. Strategies to deal with problems for which no adequate clinical data were available were identified at the symposium. Recommendations arrived at by consensus of the symposium participants (level III evidence) were added to this final report.

This document is limited to acute sinusitis in otherwise healthy people and does not address disease in patients who are immunocompromised or have underlying medical conditions or chronic sinusitis.

## Classification of sinusitis

Sinusitis is classified as acute or chronic primarily on the basis of pathological findings and the duration of infection. Kern<sup>11</sup> defined acute sinusitis as any infectious process in the sinus that lasts from 1 day to 3 weeks. Epithelial changes in the sinuses are usually reversible in the acute phase. If the disease persists for 3 months it is classified as chronic and may involve irreversible mucosal damage. As well, patients who experience more than 3 or 4 episodes annually or who repeatedly fail to respond to

medical therapy may be considered to have chronic disease. Acute sinusitis can also occur in patients with chronic sinusitis.<sup>12</sup>

The gold standard for diagnosing acute bacterial sinusitis is the culture of infected secretions obtained by direct sinus puncture.<sup>13–17</sup> A 4-view radiographic series of the sinuses may be considered a pragmatic alternative reference standard in patients with signs and symptoms consistent with sinusitis. It is considered to be about 75% as accurate as sinus aspiration and culture in diagnosing maxillary sinusitis.<sup>18</sup> Since direct sinus puncture is not routinely performed in a primary care setting, the cause is assumed to be bacterial when acute sinusitis is diagnosed.

In this article "acute bacterial sinusitis" is used only to describe cases in which bacterial infection has been documented by antral puncture. Sinusitis diagnosed clinically or with the aid of radiographs is termed "acute sinusitis."

## The paranasal sinuses

The paranasal sinuses comprise 4 paired air-filled cavities: the frontal, maxillary, ethmoid and sphenoid sinuses (Fig. 1).<sup>19,20</sup> Each cavity is lined with ciliated pseudostratified columnar epithelium and has a narrow ostium that opens into the nasal cavity. The size and shape of the sinus cavities vary between age groups and people, and even within individuals.<sup>21</sup> The posterior ethmoid sinus opens into the superior meatus, and the sphenoid sinuses open into the sphenoethmoid recess. The ostia of the frontal, maxillary and anterior ethmoid sinuses open into the os-

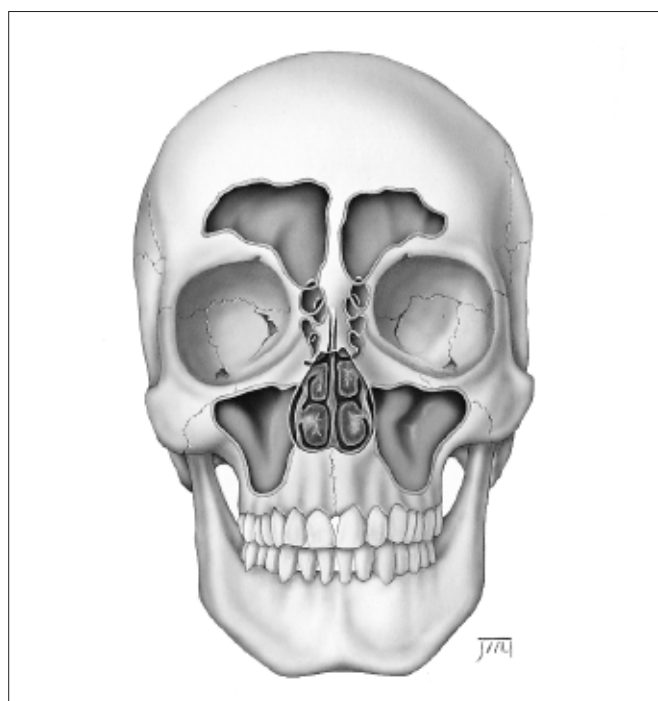

Fig. 1: The paranasal sinuses.

tiomeatal complex. Any blockage of this region will lead to obstruction of sinus drainage and potential development of sinusitis.

A protective blanket of mucus covers the respiratory cilia of the sinus and is moved constantly along predetermined pathways to the ostia. The mucous blanket exists in two layers, which act independently of one another. The first, deeper layer surrounds the cilia and seems to lubricate them as they beat through it. The cilia project slightly beyond this layer into the second, superficial layer, where inhaled particles are captured. The superficial layer floats on the first layer and is transported by the cilia. In the maxillary sinus, mucus is moved from the floor of the sinus radially up the walls and superiorly to the ostium. In the frontal sinus, mucus moves along the intersinus septum, across the roof of the sinus and across the sinus floor to the frontal recess and the middle meatus.<sup>22</sup>

## Pathogenesis of acute bacterial sinusitis

Obstruction of sinus drainage and retention of secretions are the fundamental events in sinus infection. In the absence of obstruction, inoculation of a sinus cavity with bacteria commonly associated with acute sinusitis is insufficient to produce sinusitis.<sup>23</sup> Several factors may contribute to obstruction: mucosal swelling leading to diminished patency of the ostia, abnormalities of the cilia, structural abnormalities and overproduction of secretions.<sup>4-6,23</sup> Preceding viral infection or epithelial damage weakens mucosal defenses and facilitates penetration of bacteria into the sinus mucosa.<sup>13,24-26</sup> Although nasal allergies also contribute to edema and swelling of the nasal mucosa, little information is available concerning their role in acute sinusitis.<sup>24,27-29</sup>

## Diagnosis

### *History and physical examination*

Many symptoms of acute sinusitis are nonspecific and may be difficult to differentiate from symptoms of upper respiratory tract infection or allergic rhinitis. Nasal congestion, purulent nasal drainage, facial pain (particularly unilateral), maxillary toothache and a poor response to decongestants increase the likelihood of sinusitis.<sup>1,30,31</sup>

The nostrils may be examined using a short, wide speculum mounted on a handheld otoscope.<sup>31,32</sup> Purulent secretion from the middle meatus is highly predictive of maxillary sinusitis;<sup>14,30,33</sup> however, this may be difficult to visualize unless a topical vasoconstrictive agent is used to shrink the nasal mucosa.<sup>34</sup> Direct inspection of the posterior pharynx or use of a pharyngeal mirror may reveal posteriorly draining purulent secretions.<sup>35</sup>

Facial tenderness is best assessed by applying digital pressure over the maxillary and frontal sinuses. Because 5% to 10% of cases of bacterial maxillary sinusitis are secondary to dental root infection, the maxillary teeth can be tapped with a tongue depressor to check for tenderness.<sup>30</sup> The ethmoid and sphenoid sinuses cannot be adequately evaluated during the physical examination.<sup>31</sup>

There have been few attempts to assess the accuracy of the history and physical examination in diagnosing acute sinusitis. Axelsson and Runze<sup>36</sup> evaluated 69 items historically thought to be associated with sinusitis among 164 consecutive patients with acute sinusitis. Six symptoms were found to be significantly more common ( $p < 0.01$ ) in patients with abnormal radiographs than in those with normal radiographs: preceding upper respiratory tract infection, nasal discharge (purulent or not), painful mastication, malaise, cough and hyposmia.<sup>36</sup> However, no single finding was found to be highly predictive of sinusitis.

Using paranasal sinus radiographs Williams and Sime<sup>31</sup> compared the symptoms of 247 consecutive male patients who had rhinorrhea, facial pain unrelated to trauma or self-suspected sinusitis. Radiologists blinded to the clinical findings interpreted each radiograph. Coloured nasal discharge, cough and sneezing had the greatest sensitivity (72%, 70% and 70% respectively) but were not specific (52%, 44% and 34%). Maxillary toothache was highly specific (93%), but only 11% of the patients reported it. Symptoms historically thought to make sinusitis less likely, such as sore throat (sensitivity 52%, specificity 56%), itchy eyes (sensitivity 52%, specificity 43%) and constitutional symptoms (sensitivity 56%, specificity 47%), were not discriminatory. The one potential weakness of this study was its exclusion of women.

Berg and Carefelt<sup>37</sup> examined 155 patients admitted to an emergency department with symptoms in the paranasal region. Patients were selected for the study regardless of the intensity of their symptoms; however, they could not have been symptomatic for longer than 3 months. Nasal discharge alone did not qualify the patient for the study unless examination revealed pus from the middle meatus. Clinical impression of acute bacterial sinusitis was confirmed by sinus puncture and culture. Purulent nasal discharge and facial discomfort, predominately on 1 side, were found to be the 2 most reliable indicators of sinusitis, with an overall sensitivity of 85%.

Hansen and associates<sup>38</sup> evaluated the symptoms, signs, erythrocyte sedimentation rate and C-reactive protein concentration in 174 adults suspected of having acute bacterial maxillary sinusitis by their primary care physician. Sinus puncture and culture were used as the diagnostic gold standard. Only the erythrocyte sedimentation rate and the C-reactive protein concentration were found to be independently associated with the diagnosis

of acute bacterial sinusitis. The combination of the 2 variables had a sensitivity of 82% and a specificity of 57%. None of the generally accepted signs and symptoms was independently associated with bacterial sinusitis; however, this study illustrates the relative accuracy of the primary care physician in diagnosing acute sinusitis.

Several studies have involved children.<sup>14,39,40</sup> Wald and collaborators<sup>14</sup> correlated clinical findings with both radiographic and bacteriologic findings. Clear or purulent discharge (sensitivity 76% to 84%) and cough (sensitivity 48% to 80%) were found to be the most sensitive, but the discriminating power of these findings is not known.<sup>31</sup>

### Predictive value of signs and symptoms

Combinations of signs and symptoms that best predict sinusitis have been identified using logistic regression analysis.<sup>30</sup> A 4-view radiographic series served as the gold standard in this study. Three symptoms (maxillary toothache, poor response to decongestants and history of coloured nasal discharge) and 2 signs (purulent nasal secretion and abnormal transillumination) were found to be the best predictors of sinusitis (Table 1).<sup>30,31</sup> When none of these findings was present sinusitis could be ruled out; however, when 4 or more were present, the likelihood ratio was 6.4 (Table 2).<sup>30,31</sup> The patients selected for the study were enrolled from a primary care walk-in clinic. Unlike a specialist clinic, where the prevalence of sinusitis is expected to be high, a walk-in clinic is likely to have a prevalence similar to that in the general population. Thus, the predictive values obtained were not skewed by an unrepresentative population.

### Recommendations

- Sinus puncture, with aspiration and culture of sinus secretions, remains the gold standard for diagnosis; however, this technique is invasive and impractical in most situations (level I evidence).
- No single clinical finding is predictive of acute sinusitis (level I evidence).
- Three symptoms (maxillary toothache, poor response to decongestants and history of coloured nasal discharge) and 2 signs (purulent nasal secretion and abnormal transillumination) are the best clinical predictors of acute sinusitis (level I evidence).
- When fewer than 2 of the above signs or symptoms are present acute sinusitis can be ruled out (level I evidence).
- A diagnosis of acute sinusitis may be unclear in patients with 2 or 3 of the above signs and symptoms. In this situation, sinus radiography would be helpful (level III evidence).

- When 4 or more of the signs and symptoms are present the likelihood of acute sinusitis is very high (likelihood ratio 6.4) (level I evidence).

### Transillumination

Transillumination may be used to evaluate the maxillary and frontal sinuses, but its value is controversial.<sup>13,15,39,41,42</sup> It may be even less useful in children than in adults and is completely unreliable in children under 9 years of age,<sup>18</sup> primarily because of the thickness of both the soft tissues and the bony vault, the differential rates of paranasal sinus development in children and the lack of aeration of the sinuses. Sensitivity of transillumination in children has ranged from 48% to 76%.<sup>43-45</sup>

The examination must be conducted in complete darkness. A transilluminator is placed directly against the infraorbital rim of the patient. With the patient's mouth open, the examiner judges the amount of light transmitted through the maxilla. Results are usually interpreted as opaque (no light transmission), dull (reduced light transmission) or normal. Alternatively, the transilluminator is placed in the patient's mouth, and the patient makes a tight seal around it. The examiner judges the amount of light transmitted through the maxillary sinuses. To transilluminate the frontal sinus, the light source must be placed inferior to the medial border

**Table 1: Independent predictors of acute sinusitis\***

| Symptom or sign                     | Likelihood ratio (and 95% CI†) |               |
|-------------------------------------|--------------------------------|---------------|
|                                     | Positive                       | Negative      |
| Maxillary toothache                 | 2.5 (1.2-5.0)                  | 0.9 (0.8-1.0) |
| Purulent secretion                  | 2.1 (1.5-3.0)                  | 0.7 (0.5-0.8) |
| Poor response to decongestants      | 2.1 (1.4-3.1)                  | 0.7 (0.6-0.9) |
| Abnormal transillumination result   | 1.6 (1.3-2.0)                  | 0.5 (0.4-0.7) |
| History of coloured nasal discharge | 1.5 (1.2-1.9)                  | 0.5 (0.4-0.8) |

\*Data adapted from Williams and Simel.<sup>31</sup>

†CI = confidence interval.

**Table 2: Likelihood of acute sinusitis as determined by number of signs and symptoms present\***

| No. of signs/<br>symptoms | No. of patients   |                      | Likelihood ratio |
|---------------------------|-------------------|----------------------|------------------|
|                           | With<br>sinusitis | Without<br>sinusitis |                  |
| 4                         | 16                | 4                    | 6.4              |
| 3                         | 29                | 18                   | 2.6              |
| 2                         | 27                | 39                   | 1.1              |
| 1                         | 14                | 48                   | 0.5              |
| 0                         | 2                 | 32                   | 0.1              |
| Total                     | 88                | 141                  |                  |

\*Data adapted from Williams and Simel.<sup>31</sup>

of the supraorbital ridge. Interpretation is difficult because the frontal sinuses are naturally asymmetrical.

Williams and colleagues<sup>30</sup> compared the findings of transillumination with those of paranasal radiography in 247 patients. They reported that transillumination did little to change the post-test probability of sinusitis. It generated a likelihood ratio of only 1.6 if the result was dull or opaque for either maxillary sinus, and 0.5 if it was normal for both maxillary sinuses. The authors concluded that, as a single finding, transillumination was unreliable. In contrast, Gwaltney and coworkers<sup>15</sup> found that transillumination was highly useful when the result was either opaque (likelihood ratio 4.0) or normal (likelihood ratio 0.04). Dull transillumination findings were less useful (likelihood ratio 0.41). The apparent differences between these two trials may be the result of different patient populations. In the first study<sup>30</sup> patients were recruited from a primary care walk-in clinic, whereas in the second study<sup>15</sup> patients were selected from an otolaryngology clinic.

### Recommendations

- Transillumination should be performed only by experienced personnel (level III evidence).
- Only negative findings (no loss of transmitted light) are useful (level III evidence).
- Transillumination must be performed in complete darkness (level III evidence).
- Only maxillary sinuses can be adequately evaluated (level III evidence).
- Patients must remove dental plates before the procedure (level III evidence).

### Diagnostic imaging

#### Radiography

Radiographic studies can improve the diagnostic accuracy of acute sinusitis and correlate well with sinus aspiration.<sup>13</sup> However, many issues remain unresolved, especially the question of when to order radiographs and which view to order (1 view v. 3 or 4 views). Some specialists routinely order radiography for patients with suspected sinusitis, yet it is unclear how primary care physicians should use radiography.<sup>18,35</sup>

Air–fluid levels and complete opacification of the sinus are useful features when present on radiographs, with positive predictive values of 80% to 100% in most studies.<sup>1,13,16</sup> Sensitivity is low: only about 60% of patients with sinusitis will have opacification or air–fluid levels.<sup>1</sup> The sensitivity of sinus mucosal thickening is high (greater than 90%), but it is nonspecific in symptomatic patients.<sup>1,15,16,44,45</sup> Mucosal thickening of at least 5 mm has

been used as a threshold in an attempt to optimize predictive values; however, specificities from 36% to 76% have been observed in symptomatic patients using this cutoff point.<sup>13,15,16</sup> Radiographs of sinuses in children 1 year of age or less are not useful because of false opacification due to facial asymmetry and redundant mucosa.<sup>14</sup> However, in older children, without a current upper respiratory tract infection, an abnormal radiograph of the maxillary sinus combined with fever and rhinorrhea correctly predicts acute sinusitis in 75% of cases.<sup>14</sup>

Basic radiographic examination of the paranasal sinuses includes 4 views: the Waters view (occipitomeatal), to evaluate the maxillary sinuses; the Caldwell view (angled posteroanterior), to evaluate the ethmoid and frontal sinuses; the lateral view, to evaluate the sphenoid sinuses and to confirm disease in the paired maxillary, ethmoid and frontal sinuses; and the submentovertex view, to evaluate the sphenoid and ethmoid sinuses.<sup>46,47</sup> This last view is also useful for examining the lateral walls of the maxillary sinuses. All radiographs are done with the patient erect in order to evaluate air–fluid levels.

The number and types of views that should be ordered have been examined by several investigators.<sup>46–48</sup> Hayward and associates<sup>48</sup> compared the Waters view alone with a 3-view series (Waters, occipitofrontal and lateral) and found 99% agreement. They concluded that a single Waters view is sufficient for diagnosis. Williams and collaborators<sup>47</sup> compared a single Waters view and a 4-view series and also found a high rate of agreement. However, after correcting for chance agreement they found that the results varied depending on which sinus was involved. Agreement for the maxillary sinuses was almost perfect but was poor for the remaining sinuses. The authors pointed out that maxillary sinusitis is much more prevalent than other forms. Most studies have demonstrated that about 90% of cases of sinusitis involve the maxillary sinuses.<sup>12,47</sup> Therefore, most cases of sinusitis would be diagnosed using only the Waters view. A third study compared the Waters view with a 3-view series in children (mean age 9 years).<sup>49</sup> The single Waters view had a sensitivity of 89%, a specificity of 83%, a positive predictive value of 87% and a negative predictive value of 87%. The overall accuracy of the Waters view in diagnosing acute sinusitis in children was 87%.<sup>46</sup>

When should primary care physicians order radiographs? Several studies<sup>30,48,49</sup> have shown that physicians can accurately distinguish between patients with low and high probabilities of sinusitis based on the number of clinical findings (Table 1). When 4 or more signs and symptoms are present (Table 2) the probability of sinusitis is high and further testing is unwarranted.<sup>30</sup> When less than 2 signs or symptoms are present, there is a low probability of sinusitis, and again further testing is unwarranted.

However, with 2 or 3 signs or symptoms the probability of sinusitis is intermediate, and radiographs are warranted to aid in the diagnosis.

Patients with pronounced frontal headaches should have a radiograph series performed to rule out frontal sinusitis. The posterior wall of the frontal sinus provides a relatively thin barrier to infection of the central nervous system; therefore, diagnosis and appropriate treatment is crucial in these patients.<sup>50</sup> Patients with proven frontal sinusitis should be monitored closely.

### Computerized tomography

Computerized tomography (CT) provides greater definition of the sinus cavity contents than radiography.<sup>51</sup> On the basis of clinical and endoscopic criterion standards, CT appears to be more sensitive than plain radiography for detecting sinus abnormalities, particularly in the sphenoid and ethmoid sinuses.<sup>52</sup> However, more than 40% of adults and children undergoing CT for reasons unrelated to sinus disease show some mucosal abnormality.<sup>53,54</sup> In addition, Gwaltney and colleagues<sup>55</sup> described a high incidence of significant abnormalities found on CT scans of young otherwise healthy adults with fresh colds.

### Recommendations

- In patients with fewer than 2 signs or symptoms the likelihood of acute sinusitis is low, and therefore radiographs are not required (level III evidence).
- In patients with 4 or more signs or symptoms the likelihood of acute sinusitis is high, and therefore radiographs are not required (level III evidence).
- A diagnosis of acute sinusitis may be unclear in patients with 2 or 3 associated signs and symptoms. In such cases radiography would be helpful in determining the diagnosis (level III evidence).
- Patients with frontal headaches and findings suggestive of sinusitis should have a radiograph performed to rule out frontal sinusitis (level III evidence).
- If radiography is warranted the Waters view alone should be sufficient. The Caldwell, lateral and submentovertex views can be added if the Waters view is inconclusive (level III evidence).
- Radiography should not be performed in children 1 year of age or less (level III evidence).
- CT scans are not cost-effective and should not be used routinely to diagnose acute sinusitis (level II evidence).

### Causes

The most accurate information about the causes of acute bacterial sinusitis comes from studies in which cul-

ture specimens were obtained by direct puncture and aspiration of the sinus cavity. Several studies have shown that no correlation exists between nasal and sinus cultures in acute bacterial sinusitis.<sup>13-15,17</sup>

Most information is limited to the maxillary sinus because of its accessibility. There is no information to correlate bacterial infection in the frontal, ethmoid and sphenoid sinuses with that in the maxillary sinus.<sup>56</sup> In general, the culture results of sinus puncture from different studies have been concordant (Table 3).<sup>6,14,17,18,56-59</sup>

Gwaltney and coworkers<sup>56</sup> conducted a study between 1975 and 1989 to determine the causative pathogens in community-acquired acute bacterial sinusitis. They demonstrated, through sinus puncture and direct surgical exposure, that *Streptococcus pneumoniae* and *Haemophilus influenzae* were the most common (in 41% and 35% of cases respectively). The relative incidence of these pathogens did not change significantly over the 15-year period; however, the number of strains of  $\beta$ -lactamase-producing *H. influenzae* increased dramatically. None of the *H. influenzae* strains isolated between 1975 and 1985 were  $\beta$ -lactamase producing, whereas 52% of those isolated between 1985 and 1989 were. Anaerobes and other streptococci were each isolated from 7% of sinus aspirates. *Moraxella catarrhalis* was isolated from 4% of sinus specimens and *Staphylococcus aureus* from another 3%.

*H. influenzae* and *S. pneumoniae* are most often isolated in pure culture (72% of cases) but are occasionally found together or in combination with other organisms.<sup>57</sup> *H. influenzae* strains isolated through sinus puncture are almost exclusively unencapsulated and cannot be typed.

The bacteriologic characteristics of acute maxillary sinusitis in children are similar to those of sinusitis in adults.<sup>6,58-61</sup> As in adults, *S. pneumoniae* and *H. influenzae* are the most common pathogens, representing 70% of all bacterial species isolated. However, the prevalence of sinusitis due to *M. catarrhalis* is significantly greater among children than among adults. About 25% of sinus specimens obtained from symptomatic children yield *M. catarrhalis*.<sup>6,17,58,59,65,66</sup>

**Table 3: Microbial causes of community-acquired acute bacterial sinusitis**<sup>14,17,56-59</sup>

| Organism                        | Mean % (and range) of cases |            |
|---------------------------------|-----------------------------|------------|
|                                 | Adults                      | Children   |
| <i>Streptococcus pneumoniae</i> | 34 (23-54)                  | 41 (36-47) |
| <i>Haemophilus influenzae</i>   | 35 (19-60)                  | 29 (27-32) |
| Anaerobes                       | 6 (0-10)                    | 0          |
| <i>Staphylococcus aureus</i>    | 4 (0-8)                     | 0          |
| <i>Streptococcus pyogenes</i>   | 2 (1-3)                     | 2 (2)      |
| <i>Moraxella catarrhalis</i>    | 2 (0-8)                     | 26 (23-27) |
| Gram-negative bacteria          | 4 (0-11)                    | 2 (2)      |

## Treatment

### Antimicrobial therapy

Only 3 randomized controlled trials provided evidence for the usefulness of antimicrobial agents. Axelsson and associates<sup>67</sup> compared the use of a nasal decongestant, a decongestant plus sinus irrigation, and a decongestant plus an 8- to 10-day course of antibiotic therapy in 156 patients with acute maxillary sinusitis. Patients were selected on the basis of both clinical and radiographic findings suggestive of acute maxillary sinusitis. Patients receiving the decongestant and antibiotic therapy showed significant clinical improvement compared with those given only the decongestant ( $p < 0.05$ ). No significant difference was observed between patients receiving the antibiotic therapy or those treated with sinus irrigation. Radiographic evidence of improvement, however, was significantly more prevalent in the group treated with antibiotics than in the other 2 groups ( $p < 0.05$ ). In the second study Wald and colleagues<sup>19</sup> compared the effectiveness of a 10-day course of amoxicillin, amoxicillin-clavulanate potassium and placebo in 93 children. Children were eligible if they had nasal discharge of any quality or cough, or both, that had been present for at least 10 but no longer than 30 days by their parents' estimation. Clinical improvement was seen in 79% of the children in the 2 treatment groups, but in only 60% of those in the placebo group. The overall 10-day cure rate was 67% among those in the treatment groups, compared with only 43% among those in the placebo group. Clinical assessments on day 3 and 10 of therapy showed that children in the treatment groups were significantly more likely to be cured at 3 days ( $p < 0.01$ ) and at 10 days ( $p < 0.05$ ) than the children in the placebo group. Lindbaek and coworkers<sup>68</sup> recently compared the effectiveness of amoxicillin and penicillin V against placebo in the treatment of acute sinusitis in adults. They found that the drugs were significantly more effective than placebo alone ( $p < 0.0001$ ).

Table 4 lists the antimicrobial agents appropriate for the treatment of acute bacterial sinusitis in Canada. Tables 5 and 6 list trials that have compared the efficacy of various antimicrobial regimens. Virtually all involved patients with acute maxillary sinusitis. The  $\beta$ -lactam antimicrobial agents amoxicillin and amoxicillin-clavulanate have been studied extensively,<sup>43,69-77</sup> as have the cephalosporins cefaclor, cefuroxime and cefixime,<sup>75,77-79</sup> the macrolides azithromycin and clarithromycin<sup>71-74,80</sup> and trimethoprim-sulfamethoxazole (TMP-SMX).<sup>18,50</sup> Early studies evaluated the use of erythromycin alone.<sup>81</sup>

Amoxicillin therapy is considered to be the first-line treatment of acute bacterial sinusitis. Three studies, using a standard regimen of 500 mg of amoxicillin 3 times daily

for 10 days, reported cure rates based on clinical outcome of 73%,<sup>71</sup> 72%<sup>72</sup> and 74%.<sup>74</sup> Of the patients not deemed to have complete resolution of symptoms, clinical improvement was seen in 27%, 26% and 17% respectively. The mean bacteriologic cure rate in all 3 studies, based on culture of sinus aspirates before and after treatment in all or a subgroup of patients, was greater than 90%.

Clinical cure rates for amoxicillin-clavulanate did not differ significantly from those for other antimicrobial Neilsen<sup>70</sup> compared the effectiveness of amoxicillin-clavulanate and loracarbef in acute sinusitis. Patients were assigned randomly to receive either 500/125 mg of amoxicillin-clavulanate 3 times daily for 10 days or 400 mg of loracarbef twice daily for 7-10 days. Clinical response, determined within 72 hours after the completion of drug therapy, was considered to be successful if there was improvement or clinical cure. A positive clinical response occurred in 96% of the patients given amoxicillin-clavulanate and in 92% of those given loracarbef.

Cefaclor, cefuroxime axetil and cefixime have been evaluated in both adults and children.<sup>75,77-79</sup> Camacho and associates<sup>75</sup> compared the efficacy of cefuroxime axetil (250 mg twice daily) and amoxicillin-clavulanate (500/125 mg 3 times daily). The bacteriologic cure rates were 84% and 87% respectively. No significant difference was observed in the clinical cure rate. In a similar trial, the clinical outcomes of patients treated with cefixime or amoxicillin were evaluated.<sup>77</sup> Again, no significant difference was observed between the 2 groups. When compared with cefaclor, however, cefuroxime was significantly better at eradicating the bacteria (bacteriologic cure rates 95% v. 71%;  $p < 0.05$ , Fisher's exact test).<sup>79</sup>

Several trials have examined the effectiveness of clarithromycin and azithromycin.<sup>71-74,80</sup> Both of these drugs have been shown to be as effective as amoxicillin and amoxicillin-clavulanate.<sup>71-74</sup> Although the approved dose of clarithromycin for treating acute sinusitis is 500 mg twice daily,

**Table 4: Oral antimicrobial therapy for acute bacterial sinusitis approved for use in Canada**

| Drug                       | Adult dosage    | Pediatric dosage                    |
|----------------------------|-----------------|-------------------------------------|
| Amoxicillin                | 500 mg q8h      | 40 mg/kg daily, in 3 doses          |
| Amoxicillin-clavulanate    | 500/125 mg q8h  | 45/6.4 mg/kg daily, in 2 doses      |
| Clarithromycin             | 500 mg bid      | 15 mg/kg daily, in 2 doses          |
| Cefuroxime axetil          | 250 mg bid      | 30 mg/kg daily, in 2 doses          |
| Cefaclor                   | 250 mg q8h      | 20-40 mg/kg daily, divided q8h-q12h |
| Cefixime                   | 400 mg bid      | 9 mg/kg daily                       |
| TMP-SMX*                   | 160/800 mg q12h | 8/40 mg/kg daily, in 2 doses        |
| Erythromycin-sulfisoxazole | -               | 40 mg/kg daily, in 3 doses          |

\*TMP-SMX = trimethoprim-sulfamethoxazole.



several trials have used 250 mg twice daily and have shown clinical and bacteriologic cure rates exceeding 90%.<sup>73,74,80</sup>

### Duration of antimicrobial therapy

Clinical trials have used 10- to 14-day courses of therapy. However, few have been designed to determine the optimal length of treatment for acute sinusitis. Wald and collaborators<sup>14</sup> provided evidence that a shorter duration of therapy may be efficient in children. Children receiving a 10-day course of amoxicillin or amoxicillin-clavulanate showed clinical cure or significant improvement by day 3 ( $p < 0.01$ ). Although a greater proportion were cured by day 10, the overall clinical success rate (cure or improvement) was no greater after 7 additional days of therapy.

Williams and collaborators<sup>50</sup> compared the outcomes of patients receiving either a 3- or 10-day course of TMP-SMX and a decongestant (oxymetazoline). Subjects received either 1 tablet of TMP-SMX twice daily for 10

days or 1 tablet twice daily for 3 days followed by 7 days of placebo. They were assessed clinically on days 0, 7, 14, 30 and 60, and radiographs were taken on days 0 and 14. Bacteriologic studies using secretions obtained by sinus puncture were not done. At 14 days a similar proportion of patients in the 3- and 10-day treatment groups rated their symptoms as cured or much improved (77% and 76% respectively). The median number of days to cure or improvement were 5.0 and 4.5 respectively. Radiographic evidence of improvement did not differ significantly between the groups. The investigators concluded that a 3-day course of TMP-SMX was as effective as a 10-day course. These results, however, cannot be generalized to other antimicrobial agents. Antibiotics with shorter half-lives, lower tissue penetration or narrower antimicrobial spectrums may not be as efficacious if used for only 3 days.<sup>50</sup> As well, since completion of the study by Williams and collaborators, resistance of *S. pneumoniae* to TMP-SMX has increased dramatically.

**Table 5: Results of clinical trials assessing the efficacy of antimicrobial therapy for acute bacterial sinusitis in adults**

| Trial                         | Drug regimen                                 | % of patients with clinical cure or improvement |             | % of patients with proven bacteriologic cure* |
|-------------------------------|----------------------------------------------|-------------------------------------------------|-------------|-----------------------------------------------|
|                               |                                              | Cure                                            | Improvement |                                               |
| Williams et al <sup>50</sup>  | TMP-SMX 1 tablet (double strength) bid × 3 d | 31                                              | 46          | ND                                            |
|                               | × 10 d                                       | 19                                              | 57          | ND                                            |
| Mattucci et al <sup>69</sup>  | Amoxicillin 250 mg tid                       | 50                                              | 45          | 95                                            |
|                               | Minocycline 100 mg bid                       | 40                                              | 60          | 100                                           |
| Nielsen <sup>70</sup>         | Amoxicillin-clavulanate 500/125 mg tid       | 96                                              | 96          | 96                                            |
|                               | Loracarbef 400 mg bid                        | 92                                              | 92          | 88                                            |
| Casiano <sup>71</sup>         | Amoxicillin 500 mg tid                       | 73                                              | 27          | 100                                           |
|                               | Azithromycin 500 mg × 1 d, 250 mg × 5 d      | 74                                              | 26          | 100                                           |
| Dubois et al <sup>73</sup>    | Amoxicillin-clavulanate 500/125 mg tid       | 67                                              | 26          | 90                                            |
|                               | Clarithromycin 500 mg bid                    | 64                                              | 33          | 87                                            |
| Camacho et al <sup>75</sup>   | Amoxicillin-clavulanate 500/125 mg tid       | 67                                              | 18          | 84                                            |
|                               | Cefuroxime axetil 250 mg bid                 | 63                                              | 19          | 87                                            |
| Edelstein et al <sup>77</sup> | Amoxicillin 500 mg tid                       | 47                                              | 49          | ND                                            |
|                               | Cefixime 400 mg × 10 d                       | 51                                              | 43          | ND                                            |
| Gehanno et al <sup>78</sup>   | Cefixime 400 mg × 10 d                       | 82                                              | 2.7         | 84                                            |
| Sydnor et al <sup>79</sup>    | Cefuroxime axetil 250 mg bid                 | –                                               | –           | 95+                                           |
|                               | Cefaclor 500 mg tid                          | –                                               | –           | 71+                                           |
| Muller <sup>80</sup>          | Azithromycin 500 mg × 3 d                    | 66                                              | 27          | 92                                            |
|                               | Clarithromycin 250 mg × 10 d                 | 68                                              | 27          | 93                                            |

\*ND = no data.

+ $p < 0.05$ .

## Summary

For patients with acute sinusitis, about 40% of whom will recover spontaneously, issues such as cost and safety of empirical therapy are paramount. Amoxicillin therapy is considered to be the first-line treatment of acute bacterial sinusitis. TMP-SMX can be considered for first-line therapy in patients allergic to penicillin. A 10-day course of amoxicillin has been shown to be as effective as any comparative agent.<sup>69,71-75,77</sup> Although some studies support the use of a shorter course of therapy, the data are limited.<sup>15,50</sup> Strong evidence exists, however, to support the use of a 10-day course of antimicrobial therapy.<sup>69,71-75,77</sup>  $\beta$ -lactamase-resistant agents do not offer a significant advantage for first-line therapy. Many patients, even with a proven  $\beta$ -lactamase-producing organism, will respond to amoxicillin alone.<sup>15</sup>

Second-line therapy can be used if a patient is allergic or has not responded to first-line therapy. For second-line therapy, any agent with an approved indication for acute bacterial sinusitis other than amoxicillin and TMP-SMX may be used. Although patients with a proven  $\beta$ -lactamase-producing pathogen will often respond to first-line therapy, treatment failures do occur, and second-line therapy is warranted. Patients with recurrent episodes of acute sinusitis who have been found not

to have anatomic anomalies may benefit from second-line therapy.

## Recommendations

- Antimicrobial therapy for acute bacterial sinusitis is beneficial (level II evidence).
- Amoxicillin therapy should be the first-line treatment of acute bacterial sinusitis (level I evidence).
- The duration of therapy should be 10 days (level I evidence).
- Patients who are allergic to amoxicillin or do not respond to amoxicillin therapy should be treated with a second-line antimicrobial agent (level III evidence).

## Antimicrobial resistance

Before 1972 *H. influenzae* was almost uniformly susceptible to ampicillin. Since then, however,  $\beta$ -lactamase-producing strains resistant to ampicillin have become common.<sup>85-88</sup> The presence of penicillin-binding proteins with decreased affinity for the  $\beta$ -lactam antimicrobials have also been shown to confer resistance to the penicillins and cephalosporins.<sup>89,90</sup>

In 1994 a nation-wide surveillance study of *H. influenzae* showed that 37% of strains were  $\beta$ -lactamase producing (ranging from 20% in Manitoba to 62% in Prince Edward Island).<sup>91</sup> The prevalence of these strains was higher in children than in adults (45% v. 30%). Of the  $\beta$ -lactamase-negative isolates, 1.5% were found to be resistant to ampicillin.

Although *M. catarrhalis* was once uniformly susceptible to virtually all agents used to treat respiratory tract infections, this organism has quickly developed resistance. In 1989 Wallace and colleagues<sup>92</sup> reported that rates of resistance to the penicillins had increased to more than 75%.

Penicillin-resistant *S. pneumoniae* was first described in Australia in 1967,<sup>93</sup> and the first high-level resistant strains were reported in South Africa in 1977.<sup>94</sup> The first case of infection from penicillin-resistant *S. pneumoniae* in the United States was reported in 1974 and the first isolates in Canada were described in the 1970s.<sup>95,96</sup> During the 1980s surveillance studies in Canada revealed that fewer than 1.5% of strains were of intermediate resistance and none was highly resistant.<sup>97,98</sup> However, in 1994, 7.1% of strains collected in Ontario were of intermediate resistance and 2.9% were highly resistant.

In summary, rates of antimicrobial resistance have slowly been increasing in both the community and hospital settings and are causing mounting concern that treatment failure of first-line agents could become common. This trend will require close monitoring.

**Table 6: Results of clinical trials assessing antimicrobial therapy for acute maxillary sinusitis in children**

| Trial                           | Drug (dosage)                                             | % of children with clinical cure |
|---------------------------------|-----------------------------------------------------------|----------------------------------|
| Wald et al <sup>43</sup>        | Amoxicillin 40 mg/kg daily, in 3 doses                    | 67                               |
|                                 | Amoxicillin-clavulanate 40 mg/kg daily, in 3 doses        | 64                               |
| Wald et al <sup>61</sup>        | Amoxicillin 40 mg/kg daily, in 3 doses                    | 81                               |
|                                 | Cefaclor 40 mg/kg daily, in 3 doses                       | 78                               |
| Wald et al <sup>82</sup>        | Cefaclor 40 mg/kg daily, in 3 doses                       | 92                               |
|                                 | Amoxicillin-clavulanate 40 mg/kg daily, in 3 doses        | 93                               |
| Rodriguez <sup>83</sup>         | Amoxicillin 50 mg/kg daily, in 4 doses                    | 100                              |
|                                 | Erythromycin-sulfisoxazole 50/150 mg daily, in 4 doses    | 95                               |
| Rachelefsky et al <sup>84</sup> | Amoxicillin 40 mg/kg daily, in 3 doses                    | 77                               |
|                                 | Erythromycin-ethylsuccinate 30/40 mg/kg daily, in 4 doses | 36                               |
|                                 | TMP-SMX 40/8 mg/kg daily, in 2 doses                      | 62                               |

## Adjunct therapy

### Decongestants

Although there are no published placebo-controlled studies of decongestants, these medications are often included in the treatment of acute sinusitis.<sup>2,99,100</sup>

The nasal spray decongestants phenylephrine hydrochloride (0.5%) and oxymetazoline hydrochloride (0.05%) are frequently used to treat acute sinusitis. Phenylephrine spray should be used 3 or 4 times daily for 3 days, but no longer than 1 week.<sup>12</sup> Oxymetazoline spray should be used 2 or 3 times a day, but no longer than 3 to 4 days. Patients who use either agent more frequently or for longer periods than recommended are at risk of rebound vasodilation.

Oral decongestants (pseudoephedrine and phenylpropranolamine) are  $\alpha$ -adrenergic agonists that reduce nasal blood flow. Theoretically, oral preparations can penetrate the ostiomeatal complex, where topical agents may not penetrate effectively.<sup>12</sup> The use of oral decongestants has been shown to improve nasal patency.<sup>101</sup> As well, Melen and coworkers<sup>33</sup> have demonstrated that these agents can increase the functional diameter of the maxillary ostium. Some oral decongestants are available in combination with mucosolvents, which may help to thin secretions and facilitate drainage.

### Antihistamines

Antihistamines have not proven to be effective in the management of acute sinusitis and theoretically may be harmful. Because of their anticholinergic action, antihistamines can cause dryness of mucosal membranes and may interfere with the clearance of purulent mucous secretions.<sup>12</sup> Although no controlled studies have examined the role of antihistamines in the treatment of sinusitis, the participants of the Canadian Sinusitis Symposium have recommended that antihistamines not be used to treat acute sinusitis (level III evidence).

### Glucocorticosteroids

There have been no controlled clinical trials of systemic glucocorticosteroid therapy for acute sinusitis. There are, however, several trials of topical glucocorticosteroid preparations: in one the drug was administered into the maxillary sinus and in three it was given intranasally.<sup>102-105</sup> In the first trial,<sup>102</sup> the group given a glucocorticosteroid and an antibiotic had a higher prevalence of ostia patency than the group given only an antibiotic; however, there was no difference in symptom reduction between the 2 groups. Only 1 of the other 3 trials found

inclusion of glucocorticosteroids with antibiotics to be useful.<sup>105</sup> Since glucocorticosteroids take a long time to act, an episode of acute sinusitis may resolve before their beneficial effects are noticed.

### Irrigation of the nasal cavity

Irrigation and drainage of the nasal cavity may result in dramatic relief of pain and prevent otherwise irreversible mucosal damage.<sup>106</sup> Although saline solutions of roughly physiologic proportions can be prepared by patients for this purpose, the most convenient means is through the use of a commercial product available in squeeze spray bottles.

### Recommendations

- Decongestants, along with antimicrobial therapy, are useful in treating acute sinusitis (level III evidence).
- Antihistamines are contraindicated in the management of acute sinusitis (level III evidence).
- Glucocorticosteroids have not been shown to be of any notable benefit in treating acute sinusitis. Little evidence is available to support their use (level III evidence).
- Irrigation of the nasal cavity may provide symptomatic relief (level III evidence).

### Surgery

Surgery may be necessary to facilitate drainage of the involved sinus and to remove diseased mucosa. For acute bacterial sinusitis, this should be considered only if complications are threatening, the pain is severe or the patient is not responding to medical treatment.

The introduction of functional endoscopic sinus surgery (FESS) has revolutionized the surgical approach to sinus disease. FESS is a functional rather than an enterative or ablative procedure. The affected tissue is removed and the normal tissue is left in place. FESS can surgically correct anatomic obstructions and re-establish conditions that enhance normal mucociliary clearance. Case series have shown that 80% to 90% of patients who undergo FESS experience moderate to complete relief of symptoms.<sup>107,108</sup>

## Complications of sinusitis

### Local complications

Mucocele or mucopyoceles are chronic cystic lesions of the paranasal sinuses.<sup>4,109</sup> The most common location of clinically significant lesions are the frontal sinuses; the next most common the anterior ethmoid sinus. Frontal

headaches, proptosis and diplopia secondary to downward and outward displacement of the globe are the most common initial complaints.<sup>106,110</sup>

### Orbital complications

Orbital complications are the most common complications of sinusitis, particularly in children. Direct extension can occur through neurovascular foramina, through congenital or acquired dehiscence, or through thin bone such as the lamina papyracea.<sup>4</sup>

### Intracranial complications

Meningitis is the most common intracranial complication; others include epidural abscess, subdural empyema, venous sinus thrombosis and cerebral abscess.<sup>111</sup> They can result from direct extension, septic thrombophlebitis and hematogenous spread.

### Sinusitis and asthma

Sinusitis and asthma have been linked for over a century, yet proving a casual relation between them has remained difficult. Unrecognized sinusitis has frequently been cited as a stimulus for poorly controlled asthma; some studies have reported as many as 47% of patients with asthma having radiographic evidence of sinusitis during exacerbations of their airway disease.<sup>112</sup> Sinus aspirates rarely show evidence of overt infection. However, 2 clinical observations suggest that infection may play a role: bacterial infection is more readily demonstrated in aspirates from sinuses with significant mucosal thickening, and mucosal thickening regresses after antibiotic therapy.<sup>113</sup>

The mechanisms by which sinusitis worsens asthma remain speculative. A sinobronchial reflex mediated through the vagus nerve may allow stimulation of nasal receptors to produce bronchoconstriction. Similar pathological features, mediators and cytokines have been found in bronchial and nasal biopsy specimens and lavage fluid, which suggests a common pathogenic mechanism. The finding that topical nasal corticosteroids may reduce bronchial hyperreactivity and asthma symptoms has supported both of these potential mechanisms.<sup>114</sup> The third possible mechanism is through post-nasal drip, with leakage of inflammatory mediators from the upper to the lower airways. This has been demonstrated in animal models but not in humans.<sup>115</sup>

The strongest evidence linking chronic sinusitis and asthma comes from clinical case studies showing that medical<sup>113,116</sup> or surgical<sup>117,118</sup> therapies for sinusitis lead to improved asthma symptoms and a reduction in the need for asthma medications. Occult sinusitis should be sought

in patients with poorly controlled asthma. Effective treatment of sinusitis may alleviate asthma symptoms and greatly reduce the need for systemic steroid therapy, thereby reducing morbidity.

### Indications for referral to a specialist

Most patients with acute sinusitis can be diagnosed and managed by primary care physicians. Indications for referral include the development of complications, the failure of second-line therapy and recurrent disease (more than 3 episodes per year).

### Validation

Previous guidelines for the diagnosis and treatment of acute sinusitis do not exist in Canada. The recommendations in this article are based on consensus of Canadian and American experts in infectious diseases, microbiology, otolaryngology and family medicine who participated in the Canadian Sinusitis Symposium. The guidelines were reviewed independently for the advisory committee of the symposium by 2 external experts.

The development of these guidelines and the technical support and assistance of Core Health Inc. in preparing this manuscript were funded through an unrestricted educational grant from Abbott Laboratories Canada.

### References

1. Willett LR, Carson JL, William JW. Current diagnosis and management of sinusitis. *J Gen Intern Med* 1994;9:38-45.
2. Levine HL. Acute sinusitis: impact and management. *Cleve Clin J Med* 1991; 58:296-7.
3. Norrby R. Clinical aspects on bacterial infections in the upper respiratory tract. *Scand J Infect Dis* 1983;39(suppl):14-8.
4. Friedman RA, Harris JP. Sinusitis. *Annu Rev Med* 1991;42:471-89.
5. Gantz NM, Sogg AJ. An update on sinusitis. *Patient Care* 1992;April:141-63.
6. Giebink GS. Childhood sinusitis: pathophysiology, diagnosis and treatment [review]. *Pediatr Infect Dis J* 1994;13(1 suppl 1):S55-8.
7. Gleckman RA. Acute bacterial sinusitis. *Hospital Practice* 1986;21:92-102.
8. Axelsson A, Jensen C. The roentgenologic demonstration of sinusitis. *Am J Roentgenol* 1974;122:621-7.
9. First-line management of sinusitis: A national problem? Palm Beach, Florida, April 27, 1990. Proceedings. *Otolaryngol Head Neck Surg* 1990;103(5, pt 2): 845-88.
10. Goldbloom RB, Battista RN. The periodic health examination. 1. Introduction. *Can Med Assoc J* 1986;134:721-3.
11. Kern EB. Sinusitis. *J Allergy Clin Immunol* 1984;73:25-31.
12. Stafford CT. The clinician's view of sinusitis [review]. *Otolaryngol Head Neck Surg* 1990;103(5, pt 2):870-4.
13. Evans FO Jr, Sydnor JB, Moore WEC, Moore GR, Manwaring JL, et al. Sinusitis of the maxillary antrum. *N Engl J Med* 1975;293:735-9.
14. Wald ER, Milmoie GJ, Bowen A, Ledesma-Medina J, Salamon N, Bluestone CD. Acute maxillary sinusitis in children. *N Engl J Med* 1981;304:749-54.
15. Gwaltney JM Jr, Sydnor A, Sande MA. Etiology and antimicrobial treatment of acute sinusitis. *Ann Otol Rhinol Laryngol* 1981;90:68-71.
16. Axelsson A, Grebelius N, Chidekel N, Jensen C. The correlation between radiological examination and the irrigation findings in maxillary sinusitis. *Acta Otolaryngol (Stockh)* 1970;69:302-6.
17. Axelsson A, Brorson JE. The correlation between bacteriological findings in the nose and maxillary sinus in acute maxillary sinusitis. *Laryngoscope* 1973; 83:2003-11.
18. Hamory BH, Sande MA, Sydnor A Jr, Seale DL, Gwaltney JM Jr. Etiology and antimicrobial therapy of acute maxillary sinusitis. *J Infect Dis* 1979;

- 139:197-202.
19. Nino-Murcia M, Rao VM, Mickaelian DO, Som P. Acute sinusitis mimicking antrochoanal polyp. *AJNR Am J Neuroradiol* 1986;7:513-6.
  20. Evans KL. Diagnosis and management of sinusitis. *BMJ* 1994;309:1415-20.
  21. MacLeod B. Paranasal sinus radiography. *Emerg Med Clin North Am* 1991; 9:743-55.
  22. Messerklinger W. On the drainage of the normal frontal sinus of man. *Acta Otolaryngol* 1967;643:176-81.
  23. Johansson P, Kumlien J, Carlsoo B, Drettner B, Nord CE. Experimental acute sinusitis in rabbits. A bacteriological and histological study. *Acta Otolaryngol (Stockh)* 1988;105:357-66.
  24. Karlsson G, Holmberg K. Does allergic rhinitis predispose to sinusitis? [review]. *Acta Otolaryngol Suppl (Stockh)* 1994;515:26-8.
  25. Aust R, Drettner B. Oxygen tension in the human maxillary sinus under normal and pathological conditions. *Acta Otolaryngol (Stockh)* 1974;78:264-9.
  26. Stammberger H. Endoscopic endonasal surgery: concepts in treatment of recurring rhinosinusitis. Part I. Anatomic and pathophysiologic considerations. *Otolaryngol Head Neck Surg* 1986;94:143-7.
  27. Furukawa CT. The role of allergy in sinusitis in children. *J Allergy Clin Immunol* 1992;90:515-7.
  28. Spector SL. The role of allergy in sinusitis in adults. *J Allergy Clin Immunol* 1992;90:518-20.
  29. Hinriksdottir I, Melen I. Allergic rhinitis and upper respiratory tract infections. *Acta Otolaryngol Suppl (Stockh)* 1994;515:30-2.
  30. Williams JW Jr, Simel DL, Roberts L, Samsa GP. Clinical evaluation for sinusitis: making the diagnosis by history and physical examination. *Ann Intern Med* 1992;117:705-10.
  31. Williams JW Jr, Simel DL. Does this patient have sinusitis? Diagnosing acute sinusitis by history and physical examination. *JAMA* 1993;270:1242-6.
  32. Ramadan HH. Endoscopic treatment of acute frontal sinusitis: indications and limitations. *Otolaryngol Head Neck Surg* 1995;113:295-300.
  33. Melen I, Friberg B, Andreasson L, Ivarsson A, Jannert M, Johansson CJ. Effects of phenylpropanolamine on ostial and nasal patency in patients treated for chronic maxillary sinusitis. *Acta Otolaryngol (Stockh)* 1986;101:494-500.
  34. Burtoff S. Evaluation of diagnostic methods used in cases of maxillary sinusitis, with a comparative study of recent therapeutic agents employed locally. *Arch Otolaryngol Head Neck Surg* 1947;45:516-42.
  35. Herr RD. Acute sinusitis: diagnosis and treatment update. *Am Family Physician* 1991;44:2055-62.
  36. Axelsson A, Runze U. Symptoms and signs of acute maxillary sinusitis. *ORL J Otorhinolaryngol Relat Spec* 1976;38:298-308.
  37. Berg O, Carenfelt C. Analysis of symptoms and clinical signs in the maxillary sinus empyema. *Acta Otolaryngol (Stockh)* 1988;105:343-9.
  38. Hansen JG, Schmidt H, Rosborg J, Lund E. Predicting acute maxillary sinusitis in a general practice population. *BMJ* 1995;311:233-6.
  39. McLean DC. Sinusitis in children: lessons from twenty-five patients. *Clin Pediatr* 1970;9:342-5.
  40. Kogutt MS, Swischuk LE. Diagnosis of sinusitis in infants and children. *Pediatrics* 1973;52:121-4.
  41. McNeill RA. Comparison of the findings on transillumination, x-ray and lavage of the maxillary sinus. *J Laryngol Otol* 1963;77:1009-13.
  42. Otten FWA, Grote JJ. The diagnostic value of transillumination for maxillary sinusitis in children. *Int J Pediatr Otorhinolaryngol* 1989;18:9-11.
  43. Wald ER, Chiponis D, Ledesma-Medina J. Comparative effectiveness of amoxicillin and amoxicillin-clavulanate potassium in acute paranasal sinus infections in children: a double-blind, placebo-controlled trial. *Pediatrics* 1986; 77:795-800.
  44. Pfeleiderer AG, Drake-Lee AB, Lowe D. Ultrasound of the sinuses: a worthwhile procedure? A comparison of ultrasound and radiography in predicting the findings of puncture on the maxillary sinuses. *Clin Otolaryngol* 1984;9:335-9.
  45. Kuhn JP. Imaging of the paranasal sinuses: current status. *J Allergy Clin Immunol* 1986;77:6-8.
  46. Ros SP, Herman BE, Azar-Kia B. Acute sinusitis in children: Is the Waters view sufficient? *Pediatr Radiol* 1995;25:306-7.
  47. Williams JW Jr, Roberts L Jr, Distell B, Simel DL. Diagnosing sinusitis by x-ray: Is a single Waters view adequate? *J Gen Intern Med* 1992;7:481-5.
  48. Hayward MWJ, Lyons K, Ennis WP. Radiology of the paranasal sinuses: 1 or 3 view? *Clin Radiol* 1990;41:163-4.
  49. Williams JW Jr, Simel DL. A multivariable logistic regression model for diagnosing sinusitis by clinical examination [abstract]. *Clin Res* 1991;39:887A.
  50. Williams JW Jr, Holleman DR Jr, Samsa GP, Simel DL. Randomized controlled trial of 3 vs 10 days of trimethoprim/sulfamethoxazole for acute maxillary sinusitis. *JAMA* 1995;273:1015-21.
  51. Carter BL, Bankoff MS, Fisk JD. Computed tomographic detection of sinusitis responsible for intracranial and extracranial infections. *Radiology* 1983; 147:739-42.
  52. Nass RI, Holliday RA, Reede DL. Diagnosis of surgical sinusitis using endoscopy and computerized tomography. *Laryngoscope* 1989;111:1158-60.
  53. Havas TE, Motbey JA, Gullane PJ. Prevalence of incidental abnormalities on computed tomographic scans of the paranasal sinuses. *Arch Otolaryngol Head Neck Surg* 1988;114:856-9.
  54. McAlister WH, Lusk R, Muntz HR. Comparison of plain radiographs and coronal CT scans in infants and children with recurrent sinusitis. *AJR Am J Roentgenol* 1989;153:1259-64.
  55. Gwaltney JM, Phillips CD, Miller RD, Riker DK. Computed tomographic study of the common cold. *N Engl J Med* 1994;330:25-30.
  56. Gwaltney JM Jr, Scheld WM, Sande MA, Sydnor A. The microbial etiology and antimicrobial therapy of adults with acute community-acquired sinusitis: a fifteen-year experience at the University of Virginia and review of other selected studies [review]. *J Allergy Clin Immunol* 1992;90(3 pt 2):457-61.
  57. Jousimies-Somer HR, Savolainen S, Ylikoski JS. Bacteriological findings of acute maxillary sinusitis in young adults. *J Clin Microbiol* 1988;26:1919-25.
  58. Wald ER. Microbiology of acute and chronic sinusitis in children. *J Allergy Clin Immunol* 1992;90:452-6.
  59. Wald ER. Epidemiology, pathophysiology and etiology of sinusitis. *Pediatr Infect Dis J* 1985;4:S51-3.
  60. Berg O, Carenfelt C, Kronvall G. Bacteriology of maxillary sinusitis in relation to character of inflammation and prior treatment. *Scand J Infect Dis* 1988; 20:511-6.
  61. Wald ER, Reilly JS, Casselbrant M, Ledesma-Medina J, Milmo GJ, Bluestone CD, et al. Treatment of acute maxillary sinusitis in childhood: a comparative study of amoxicillin and cefaclor. *J Pediatr* 1984;104:297-302.
  62. Van Cauwenberge P, Verschraegen G, Van Renterghem I. Bacteriological findings in sinusitis (1963-1975). *Scand J Infect Dis* 1976;9(suppl):72-7.
  63. Sydnor TA Jr, Scheld WM, Gwaltney J Jr, Nielsen RW, Huck W, Therasse DG. Loracarbef (LY 163892) vs amoxicillin/clavulanate in bacterial maxillary sinusitis. *Ear Nose Throat J* 1992;71:225-32.
  64. Wald ER, Byers C, Guerra N. Subacute sinusitis in children. *J Pediatr* 1989; 115:28-32.
  65. Axelsson A, Chidekel N. Symptomatology and bacteriology correlated to radiological findings in acute maxillary sinusitis. *Acta Otolaryngol* 1972;74:118-22.
  66. Ferguson BJ. Acute and chronic sinusitis. *Postgrad Med* 1995;97:45-57.
  67. Axelsson A, Chidekel N, Grebelius N, Jensen C. Treatment of acute maxillary sinusitis: a comparison of four different methods. *Acta Otolaryngol (Stockh)* 1970;70:71-6.
  68. Lindbaek M, Hjortdahl P, Johnson ULH. Randomised, double blind, placebo controlled trial of penicillin V and amoxicillin in treatment of acute sinus infections in adults. *BMJ* 1996;313:325-9.
  69. Mattucci KF, Levin WJ, Habib MA. Acute bacterial sinusitis: minocycline vs amoxicillin. *Arch Otolaryngol Head Neck Surg* 1986;112:73-6.
  70. Nielsen RW. Acute bacterial maxillary sinusitis: results of US and European comparative therapy trials. *Am J Med* 1992;92(suppl 6A):70S-73S.
  71. Casiano RR. Azithromycin and amoxicillin in the treatment of acute maxillary sinusitis. *Am J Med* 1991;91(suppl 3A):27S-30S.
  72. Felstead SJ, Danel R, European Azithromycin Study Group. Short course treatment of sinusitis and other upper respiratory tract infections with azithromycin: a comparison with erythromycin and amoxicillin. *J Int Med Res* 1991;19:363-72.
  73. Dubois J, Saint-Pierre C, Tremblay C. Efficacy of clarithromycin vs amoxicillin/clavulanate in the treatment of acute maxillary sinusitis. *Ear Nose Throat J* 1993;72:1-4.
  74. Karma P, Pukander J, Penttila M, Ylikoski J, Savolainen S, Olen L, et al. The comparative efficacy and safety of clarithromycin and amoxicillin in the treatment of outpatients with acute maxillary sinusitis. *J Antimicrob Chemother* 1991;27(suppl A):83-90.
  75. Camacho AE, Cobo R, Otte J, Spector SL, Lerner CJ, Garrison NA, et al. Clinical comparison of cefuroxime axetil and amoxicillin/clavulanate in the treatment of patients with acute bacterial maxillary sinusitis. *Am J Med* 1992;93:271-6.
  76. Kment G, Georgopoulos A, Ridl W, Muhlbacher J. Amoxicillin concentrations in nasal secretions of patients with acute uncomplicated sinusitis and in paranasal sinus mucosa of patients with chronic sinusitis. *Eur Arch Otorhinolaryngol* 1995;252:236-8.
  77. Edelstein DR, Avner SE, Chow JM, Duerksen RL, Johnson J, Ronis M, et al. Once-a-day therapy for sinusitis: a comparison study of cefixime and amoxicillin [review]. *Laryngoscope* 1993;103(1 pt 1):33-41.
  78. Gehanno P, Boucot I, Berche P, Uhlrich J. Clinical efficacy and tolerability of cefixime in the treatment of acute sinusitis. *Drugs* 1991;42(suppl 4):19-24.
  79. Sydnor A Jr, Gwaltney JM Jr, Cocchetto DM, Scheld WM. Comparative evaluation of cefuroxime axetil and cefaclor for treatment of acute bacterial maxillary sinusitis. *Arch Otolaryngol Head Neck Surg* 1989;115:1430-3.
  80. Muller O. Comparison of azithromycin versus clarithromycin in the treatment of patients with upper respiratory tract infections. *J Antimicrob Chemother* 1993;31(suppl E):137-46.
  81. Kalm O, Kamme C, Bergstrom B, Lofkvist T, Norman O. Erythromycin stearate in acute maxillary sinusitis. *Scand J Infect Dis* 1975;7:209-17.
  82. Wald ER, Reilly JS, Cassalbrant MC, et al. Treatment of acute sinusitis in children: augmentin vs cefaclor. *Postgrad Med* 1984;Sept/Oct:133-6.
  83. Rodriguez RS, De La Torre C, Sanchez C, et al. Bacteriology and treatment of acute maxillary sinusitis in children: a comparative study of erythromycin-sulfisoxazole and amoxicillin [abstract no 328]. 28th Interscience Conference on Antimicrobial Agents and Chemotherapy; 1988 Oct 23-26; Los Angeles.
  84. Rachelefsky GS, Katz RM, Siegel SC. Chronic sinusitis in children with respiratory allergy: the role of antimicrobials. *J Allergy Clin Immunol* 1982;69:382-7.
  85. Khan W, Ross S, Rodriguez W, Controni G, Saz AK. *Haemophilus influenzae* type b resistant to ampicillin: a report of two cases. *JAMA* 1974;229:298-301.

86. Tomeh MO, Starr SE, McGowan JE Jr, Terry PM, Nahmias AJ. Ampicillin-resistant *Haemophilus influenzae* type b infection. *JAMA* 1974;229:295-7.
87. Sykes RB, Matthew M, O'Callaghan CH. R-factor mediated beta-lactamase production by *Haemophilus influenzae*. *J Med Microbiol* 1975;8:437-41.
88. Daum RS, Murphey-Corb M, Shapira E, Dipp S. Epidemiology of rob beta-lactamase among ampicillin-resistant *Haemophilus influenzae* isolates in the United States. *J Infect Dis* 1988;157:450-5.
89. Markowitz SM. Isolation of an ampicillin resistant, non-beta-lactamase producing strain of *Haemophilus influenzae*. *Antimicrob Agents Chemother* 1980;17:80-3.
90. Mendelman PM, Chaffin DO, Stull TL, Rubens CE, Mack KD, Smith AL. Characterization of non-beta-lactamase-mediated ampicillin resistance in *Haemophilus influenzae*. *Antimicrob Agents Chemother* 1984;26:235-44.
91. Matsumura S, Sciver SR, Palatnik L, et al. Cross Canada surveillance of *Haemophilus influenzae* [abstract no E22]. 34th Interscience Conference on Antimicrobial Agents and Chemotherapy; 1994 Oct 4-7; Orlando (FL).
92. Wallace RJ Jr, Steingrube VA, Nash DR, Hollis DG, Flanagan C, Brown BA, et al. BRO beta-lactamases of *Branhamella catarrhalis* and *Moraxella* subgenus *Moraxella*, including evidence for chromosomal beta-lactamase transfer by conjugation in *B. catarrhalis*, *M. nonliquefaciens*, and *M. lacunata*. *Antimicrob Agents Chemother* 1989;33:1845-54.
93. Hansman D, Bullen MM. A resistant pneumococcus [letter]. *Lancet* 1967;2:264-5.
94. Appelbaum PC, Bhamjee A, Scragg JN, Hallett AF, Brown AJ, Cooper RC. *Streptococcus pneumoniae* resistant to penicillin and chloramphenicol. *Lancet* 1977;2:995-7.
95. Dixon JMS, Lipinski AE, Graham MEP. Detection and prevalence of pneumococci with increased resistance to penicillin. *Can Med Assoc J* 1977;117:1159-61.
96. Otis CL, Monoz TJ, Sala IS. Antibiotic susceptibility of *Streptococcus pneumoniae* isolates from pediatric patients. *J Antimicrob Chemother* 1988;22:659-65.
97. Jette LP, Lamothe F, Pneumococcus Study Group. Surveillance of invasive *Streptococcus pneumoniae* infection in Quebec, Canada from 1984 to 1986: serotype distribution, antimicrobial susceptibility and clinical characteristics. *J Clin Microbiol* 1989;27:1-5.
98. Mazzulli T, Simor AE, Jaeger R, Fuller S, Low DE. Comparative in vitro activities of several new fluoroquinolones and beta-lactam antimicrobial agents against community isolates of *Streptococcus pneumoniae*. *Antimicrob Agents Chemother* 1990;34:467-9.
99. Malow JB, Creticos CM. Nonsurgical treatment of sinusitis. *Otolaryngol Clin North Am* 1989;22:809-18.
100. Kern EB. Suppurative (bacterial) sinusitis. *Postgrad Med* 1987;81:194-210.
101. Roth RP, Cantekin VI, Bluestone CD. Nasal decongestant activity of pseudoephedrine. *Ann Otol Rhinol Laryngol* 1987;86:235-41.
102. Cuenant G, Stipon JP, Plante-Longchamp G, Baudoin C, Guerrier Y. Efficacy of endonasal neomycin-tixocortol pivalate irrigation in the treatment of chronic allergic and bacterial sinusitis. *ORL J Otorhinolaryngol Relat Spec* 1986;48:226-32.
103. Sykes DA, Chan KL, Wilson R. Relative importance of antibiotic and glucocorticoid on improved clearance in topical treatment of chronic mucopurulent rhinosinusitis. *Lancet* 1986;2:359-60.
104. Qvarnberg Y, Kantola O, Salo J, Toivanen M, Valtonen H, Vuori E. Influence of topical steroid treatment on maxillary sinusitis. *Rhinology* 1992;30:103-12.
105. Meltzer EO, Busse WW, Druce HM, et al. Assessment of flunisolide nasal spray vs placebo as an adjunct to antibiotic treatment of sinusitis [abstract]. *J Allergy Clin Immunol* 1992;89:301-2.
106. Berg O, Lejdebom L. Experience of a permanent ventilation and drainage system in the management of purulent maxillary sinusitis. *Ann Otol Rhinol Laryngol* 1990;99:192-6.
107. Levine HL. Functional endoscopic sinus surgery: evaluation, surgery, and followup of 250 patients. *Laryngoscope* 1990;100:79-84.
108. Rice DH. Endoscopic sinus surgery: results at 2 year followup. *Otolaryngol Head Neck Surg* 1991;104:244-6.
109. Peterson JA. Acute sinusitis: severe complications. *Emerg Decis* 1988;Nov/Dec:31-8.
110. Wagenmann M, Naclerio RM. Complications of sinusitis. *J Allergy Clin Immunol* 1992;90:552-4.
111. Rood SR. *Complications of acute and chronic sinus disease. Self-instructional packet*. Washington: American Academy of Otolaryngology and Head and Neck Surgery Foundation, 1982.
112. Schwartz HJ, Thompson JS, Sher TH, Ross RJ. Occult sinus abnormalities in the asthmatic patient. *Arch Intern Med* 1987;147:2194-6.
113. Racelesky GS, Katz RM, Siegel SC. Chronic sinus disease with associated reactive airway disease in children. *Pediatrics* 1984;73:526-9.
114. Reed CE, Marcoux JP, Welsh PW. Effects of topical nasal treatment on asthma symptoms. *J Allergy Clin Immunol* 1988;81:1042-7.
115. Bardin PG, Van Heerden BB, Joubert JR. Absence of pulmonary aspiration of sinus contents in patients with asthma and sinusitis. *J Allergy Clin Immunol* 1990;86:82-8.
116. Friedman R, Ackerman M, Wald E. Asthma and bacterial sinusitis in children. *J Allergy Clin Immunol* 1984;74:185-9.
117. Mings R, Friedman WH, Linford P, et al. Five year follow-up of the effects of bilateral intranasal sphenoidectomy in patients with sinusitis and asthma. *Am J Rhinol* 1988;71:123-32.
118. Slavin RG. Relationship of nasal disease and sinusitis to bronchial asthma. *Ann Allergy* 1982;49:76-80.

**Reprint requests to:** Core Health Inc., 200-7135 W Credit Ave., Building 1, Mississauga ON L5N 6J7

**Information about the authors:** Dr. Low is Professor of Medicine and Microbiology, University of Toronto, and Microbiologist-in-Chief at the Mount Sinai and Princess Margaret Hospitals, Toronto, Ont. Dr. Desrosiers is an Assistant Professor of Otolaryngology, Université de Montréal, McGill University and Hôtel-Dieu de Montréal, and is on staff at the Montreal General Hospital, Montreal, Que. Dr. McSherry is Professor of Family Medicine, University of Western Ontario, and Chief of Family Medicine, London Health Sciences Centre, London, Ont. Dr. Garber, is an Associate Professor of Medicine, University of Ottawa, and Head of Infectious Disease, University of Ottawa and Ottawa General Hospital, Ottawa, Ont. Dr. Williams is an Assistant Professor of Medicine, University of Texas Health Science Center at San Antonio, and Director of the Continuity Care Clinics of the Ambulatory Care Service, Audie L. Murphy Memorial Veterans Hospital, San Antonio, Texas. Dr. Remy is an Associate Professor of Radiology, McGill University, and Senior Radiologist, Montreal General Hospital, Montreal, Que. Dr. Fenton is an Associate Professor of Otolaryngology, University of Toronto, and Otolaryngologist-in-Chief at St. Michael's Hospital, Toronto, Ont. Dr. Forte is an Assistant Professor of Otolaryngology, University of Toronto, and is on staff at the Hospital for Sick Children and a consultant on staff at the Neonatal Intensive Care Unit, Mount Sinai and Women's College Hospitals, Toronto, Ont. Dr. Balter is an Assistant Professor of Medicine, University of Toronto, and Director of the Asthma Education Clinic, Mount Sinai Hospital, Toronto, Ont. Dr. Rotstein is an Associate Professor of Medicine, McMaster University, and an infectious disease consultant at the Hamilton Civic Hospitals (Henderson General Division), Hamilton, Ont. Dr. Craft is Head, Macrolide Venture, Abbott Laboratories, Abbott Park, Ill. Dr. Dubois is in the Microbiology and Infectious Disease Department, Centre universitaire de Santé de l'Estrie,

Sherbrooke, Que. Dr. Harding is Professor of Medicine and Medical Microbiology, University of Manitoba, and Head of the Departments of Infectious Disease and Microbiology, St. Boniface General Hospital, Winnipeg, Man. Dr. Schloss is Professor and Chairman, Department of Otolaryngology, McGill University, and is on staff at the Montreal Children's Hospital, Montreal, Que. Dr. Miller is an Associate Professor of Medicine, McGill University, Chief of the Department of Microbiology and Head of the Division of Infectious Diseases, Sir Mortimer B. Davis-Jewish General Hospital, Montreal, Que. Dr. McIvor is an Assistant Professor of Medicine, University of Toronto, and Staff Respirologist at the Sunnybrook Health Science Centre, Toronto, Ont. Dr. Davidson is in the Department of Microbiology, University of Toronto and Mount Sinai Hospital, Toronto, Ont.

**Other participants at the Canadian Sinusitis Symposium:** Dr. Jacques Bouchard, St. Joseph Hospital, LaMalbaie, Que; Dr. Kevin D. Clarke, Department of Pediatric Otolaryngology, Izaak Walton Killam Grace Health Care Centre, and Department of Otolaryngology, Dalhousie University, Halifax, NS; Dr. Thomas Janzen, St. Joseph's Health Care Centre, London Psychiatric Hospital, London, Ont; Dr. Robert E. MacDonald, Department of Otolaryngology Head and Neck Surgery, University of Toronto, and Department of Otolaryngology, Hospital for Sick Children, Toronto, Ont., North York General Hospital, North York, Ont., and Lake of the Woods Hospital, Kenora Ont; and Dr. S. Joseph Warshawski, Faculty of Medicine, University of Calgary, Calgary District Hospital Group, Southern Alberta Regional Cancer Centre, Tom Baker Centre, Alberta Children's Hospital, Calgary, Alta.
